# Supplementary material for: Bone Deleterious Effects of Different NRTIs in Treatment-naïve HIV Patients After 12 and 48 Weeks of Treatment
Source: PubMed Central journal article supplement — Curr HIV Res. 2021 Dec 17;19(5):434–47. doi: 10.2174/1570162X19666210805094434 (PMC9175084; doi:10.2174/1570162x19666210805094434), 2021-12-17
Supplement: CHIVR-19-434_SD1.pdf [file CHIVR-19-434_SD1.pdf]

## Supplementary Material

### Bone Deleterious Effects of Different NRTIS in Treatment-naive HIV Patients After 12 and 48 Weeks of Treatment

Patricia Atencio<sup>1,\*</sup>, Francisco Miguel<sup>1</sup> Conesa-Buendía<sup>2</sup>, Alfonso Cabello-Ubeda<sup>1,\*</sup>, Patricia Llamas-Granda<sup>2</sup>, Ramón Pérez-Tanoira<sup>1</sup>, Laura Prieto-Pérez<sup>1</sup>, Beatriz Álvarez Álvarez<sup>1</sup>, Irene CarrilloA-costa<sup>1</sup>, Rosa Arboiro-Pinel<sup>3</sup>, Manuel Díaz-Curiel<sup>3</sup>, Raquel Largo<sup>2</sup>, Gabriel Herrero Beaumont<sup>2</sup>, Miguel Górgolas<sup>1,#</sup> and Aránzazu Mediero<sup>2,#</sup>

<sup>1</sup>Division of Infectious Diseases. Fundación Jiménez Díaz University Hospital. Research Health Institute, Autónoma de Madrid University (IIS-FJD, UAM). Madrid 28040, Spain; <sup>2</sup>Bone and Joint Research Unit. Research Health Institute, Autónoma de Madrid University (IIS-FJD, UAM). Madrid 28040, Spain; <sup>3</sup>Internal Medicine, Bone Disease Department. Fundación Jiménez Díaz University Hospital. Research Health Institute, Autónoma de Madrid University (IIS-FJD, UAM). Madrid 28040, Spain

**Supplemental Table 1: Association between Z-score and variables 48 weeks post-treatment in TDF treated patients.**

| Variable          | Z-score LS   |              | Z-score FN  |              |
|-------------------|--------------|--------------|-------------|--------------|
|                   | Coef         | p Value      | Coef        | p Value      |
| Ca                | 0.25         | 0.410        | -0.09       | 0.771        |
| P                 | -0.43        | 0.108        | -0.02       | 0.950        |
| 25 OH Vit. D      | 0.41         | 0.143        | 0.08        | 0.776        |
| CD4               | -0.45        | 0.094        | 0.08        | 0.776        |
| CD8               | -0.23        | 0.411        | 0.31        | 0.262        |
| CD4/CD8 ratio     | -0.41        | 0.125        | -0.18       | 0.516        |
| Total Cholesterol | -0.33        | 0.233        | 0.18        | 0.511        |
| Triglycerides     | -0.22        | 0.426        | 0.27        | 0.334        |
| CTX               | -0.13        | 0.687        | 0.01        | 0.991        |
| P1NP              | <b>-0.55</b> | <b>0.065</b> | -0.21       | 0.514        |
| OC                | -0.19        | 0.563        | -0.01       | 0.991        |
| TRAP              | 0.20         | 0.502        | 0.25        | 0.382        |
| PTH               | 0.60         | 0.242        | -0.31       | 0.564        |
| DKK1              | -0.23        | 0.422        | 0.07        | 0.805        |
| OPG               | 0.28         | 0.352        | <b>0.48</b> | <b>0.098</b> |
| OPN               | -0.01        | 0.982        | 0.17        | 0.568        |
| SOST              | -0.14        | 0.648        | 0.23        | 0.459        |
| FGF23             | 0.00         | 1.000        | 0.46        | 0.111        |
| RANKL             | -0.40        | 0.258        | 0.05        | 0.894        |

Supplemental Table 2: Association between Z-score and variables 48 weeks post-treatment in TAF treated patients.

| Variable          | Z-score LS   |              | Z-score FN  |              |
|-------------------|--------------|--------------|-------------|--------------|
|                   | Coef         | p Value      | Coef        | p Value      |
| Ca                | <b>-0.49</b> | <b>0.056</b> | 0.15        | 0.584        |
| P                 | -0.03        | 0.914        | -0.21       | 0.450        |
| 25 OH Vit D       | -0.15        | 0.603        | -0.06       | 0.834        |
| CD4               | -0.07        | 0.786        | 0.32        | 0.223        |
| CD8               | 0.08         | 0.778        | 0.01        | 0.970        |
| CD4/CD8 ratio     | <b>-0.44</b> | <b>0.091</b> | 0.38        | 0.142        |
| Total Cholesterol | -0.47        | 0.063        | 0.03        | 0.905        |
| Triglycerides     | 0.19         | 0.484        | -0.16       | 0.557        |
| CTX               | 0.01         | 0.987        | 0.86        | 0.002        |
| PINP              | -0.36        | 0.280        | 0.06        | 0.852        |
| OC                | -0.40        | 0.120        | 0.22        | 0.411        |
| TRAP              | 0.14         | 0.616        | -0.10       | 0.708        |
| PTH               | -0.42        | 0.223        | <b>0.77</b> | <b>0.009</b> |
| DKK1              | 0.47         | 0.064        | -0.28       | 0.286        |
| OPG               | 0.43         | 0.101        | -0.38       | 0.147        |
| OPN               | 0.07         | 0.794        | -0.03       | 0.910        |
| SOST              | 0.19         | 0.579        | 0.05        | 0.884        |
| FGF23             | -0.13        | 0.662        | 0.00        | 0.994        |
| RANKL             | 0.62         | 0.115        | 0.60        | 0.132        |

**Supplemental Table 3: Association between Z-score and variables 48 weeks post-treatment in ABC treated patients.**

| Variable          | Z-score LS   |              | Z-score FN |         |
|-------------------|--------------|--------------|------------|---------|
|                   | Coef         | p Value      | Coef       | p Value |
| Ca                | 0.02         | 0.903        | -0.05      | 0.785   |
| P                 | -0.10        | 0.549        | 0.05       | 0.783   |
| 25 OH Vit. D      | 0.02         | 0.921        | -0.15      | 0.375   |
| CD4               | -0.02        | 0.923        | 0.27       | 0.091   |
| CD8               | 0.13         | 0.442        | 0.17       | 0.305   |
| CD4/CD8 ratio     | <b>-0.33</b> | <b>0.039</b> | -0.05      | 0.755   |
| Total Cholesterol | -0.18        | 0.283        | -0.49      | 0.002   |
| Triglycerides     | -0.09        | 0.583        | -0.22      | 0.188   |
| CTX               | 0.01         | 0.975        | 0.04       | 0.840   |
| P1NP              | -0.07        | 0.667        | -0.20      | 0.233   |
| OC                | -0.10        | 0.523        | -0.10      | 0.523   |
| TRAP              | 0.00         | 0.991        | -0.21      | 0.204   |
| PTH               | -0.29        | 0.210        | -0.11      | 0.635   |
| DKK1              | -0.03        | 0.870        | -0.11      | 0.526   |
| OPG               | <b>-0.39</b> | <b>0.016</b> | -0.13      | 0.441   |
| OPN               | 0.04         | 0.813        | 0.06       | 0.740   |
| SOST              | <b>-0.29</b> | <b>0.088</b> | -0.06      | 0.713   |
| FGF23             | 0.23         | 0.185        | -0.18      | 0.299   |
| RANKL             | 0.21         | 0.369        | -0.05      | 0.840   |

**Supplemental Table 4: Absolute changes analysis at 12 weeks of treatment with treatment x time interaction. ANOVA provides three p-values, for time effect, treatment effect and interaction between time and treatment.**

| Variable          | TDF         | TAF          | ABC          | Time p-value | Treatment p-value | Interaction p-value |
|-------------------|-------------|--------------|--------------|--------------|-------------------|---------------------|
| Ca                | 0.07 ± 0.49 | 0.08 ± 0.55  | 0.14 ± 0.39  | 0.368        | 0.032             | 0.912               |
| P                 | 0.01 ± 1.23 | 0.12 ± 0.55  | -0.24 ± 0.98 | 0.321        | 0.977             | 0.948               |
| 25OH Vit.D        | 2.20 ± 10.5 | 9.13 ± 12.8  | 0.19 ± 10.1  | 0.601        | 0.146             | 0.029               |
| CD4               | 204 ± 222   | 131 ± 148    | 127 ± 211    | <b>0.018</b> | 0.946             | 0.303               |
| CD8               | -18.7 ± 465 | 41.0 ± 703   | -79.4 ± 397  | 0.963        | 0.348             | 0.760               |
| CD4/CD8 ratio     | 0.21 ± 0.28 | 0.18 ± 0.24  | 0.24 ± 0.32  | <b>0.020</b> | 0.996             | 0.840               |
| Total Cholesterol | 18.1 ± 28.7 | 35.1 ± 31.3  | -2.53 ± 28.0 | 0.228        | 0.091             | 0.239               |
| Triglycerides     | 14.9 ± 52.9 | 27.6 ± 45.0  | 10.8 ± 43.7  | 0.632        | 0.524             | 0.841               |
| CTX               | 0.12 ± 0.15 | 0.08 ± 0.13  | 0.16 ± 0.27  | 0.151        | 0.218             | 0.207               |
| P1NP              | 10.7 ± 15.1 | 6.61 ± 18.8  | 16.9 ± 7.85  | <b>0.009</b> | 0.186             | 0.613               |
| OC                | 4.05 ± 6.08 | 6.13 ± 7.87  | 6.34 ± 5.33  | <b>0.054</b> | 0.438             | 0.566               |
| TRAP              | 0.50 ± 1.65 | 0.65 ± 1.02  | 0.44 ± 0.70  | 0.669        | 0.741             | 0.944               |
| PTH               | 1.03 ± 18.5 | -1.81 ± 13.6 | -0.00 ± 25.5 | 0.925        | 0.797             | 0.464               |

|              |             |             |             |       |       |       |
|--------------|-------------|-------------|-------------|-------|-------|-------|
| <b>DKK1</b>  | -146 ± 371  | -105 ± 306  | -118 ± 338  | 0.097 | 0.318 | 0.988 |
| <b>OPG</b>   | -24.7 ± 156 | -62.6 ± 101 | -75.7 ± 116 | 0.362 | 0.167 | 0.595 |
| <b>OPN</b>   | 229 ± 6935  | 2351 ± 8396 | 3083 ± 6431 | 0.914 | 0.169 | 0.670 |
| <b>SOST</b>  | -139 ± 802  | -390 ± 619  | -228 ± 547  | 0.490 | 0.089 | 0.749 |
| <b>RANKL</b> | 6.36 ± 48.5 | 9.30 ± 75.5 | 9.68 ± 44.0 | 0.465 | 0.302 | 0.406 |

**Supplemental Table 5: Absolute changes analysis at 48 weeks of treatment with treatment x time interaction.** ANOVA provides three p-values, for time effect, treatment effect and interaction between time and treatment.

| Variable                 | TDF          | TAF          | ABC          | Time             | Treatment    | Interaction  |
|--------------------------|--------------|--------------|--------------|------------------|--------------|--------------|
| <b>Ca</b>                | 0.05 ± 0.42  | 0.14 ± 0.50  | 0.35 ± 0.37  | <b>0.023</b>     | 0.126        | 0.785        |
| <b>P</b>                 | -0.10 ± 1.31 | 0.02 ± 0.64  | -0.26 ± 0.89 | 0.060            | 0.958        | 0.972        |
| <b>25OH Vit. D</b>       | 2.96 ± 9.51  | 3.43 ± 7.23  | 2.38 ± 9.88  | <b>0.007</b>     | 0.068        | 0.951        |
| <b>CD4</b>               | 310 ± 327    | 213 ± 216    | 57.2 ± 245   | 0.503            | 0.576        | 0.081        |
| <b>CD8</b>               | -118 ± 483   | -151 ± 880   | -301 ± 515   | 0.727            | 0.416        | 0.576        |
| <b>CD4/CD8 ratio</b>     | 0.40 ± 0.37  | 0.30 ± 0.23  | 0.30 ± 0.27  | 0.191            | 0.632        | 0.346        |
| <b>Total Cholesterol</b> | 22.9 ± 31.1  | 28.5 ± 39.6  | 14.6 ± 34.8  | 0.217            | 0.121        | 0.673        |
| <b>Triglycerides</b>     | 33.1 ± 89.5  | 15.8 ± 42.5  | -6.50 ± 40.9 | 0.788            | 0.299        | 0.104        |
| <b>CTX</b>               | 0.17 ± 0.18  | 0.09 ± 0.16  | 0.23 ± 0.17  | <b>0.036</b>     | 0.136        | <b>0.007</b> |
| <b>PINP</b>              | 12.8 ± 17.1  | 13.2 ± 17.4  | 29.7 ± 19.6  | <b>0.002</b>     | <b>0.001</b> | <b>0.003</b> |
| <b>OC</b>                | 4.92 ± 7.93  | 2.56 ± 8.42  | 8.92 ± 4.90  | 0.162            | <b>0.029</b> | <b>0.003</b> |
| <b>TRAP</b>              | 2.06 ± 2.21  | 6.05 ± 8.25  | 1.81 ± 2.16  | 0.111            | 0.016        | <b>0.006</b> |
| <b>PTH</b>               | 6.15 ± 25.0  | 9.68 ± 15.5  | 8.74 ± 15.5  | 0.249            | 0.949        | 0.588        |
| <b>DKK1</b>              | -36.9 ± 327  | -154 ± 329   | 105 ± 549    | 0.085            | 0.308        | 0.834        |
| <b>OPG</b>               | -21.6 ± 121  | -23.1 ± 150  | -9.15 ± 146  | 0.510            | 0.622        | 0.942        |
| <b>OPN</b>               | -1329 ± 6066 | 651 ± 4700   | 2955 ± 7875  | 0.232            | 0.122        | 0.486        |
| <b>SOST</b>              | 173 ± 1116   | -9.16 ± 1125 | 240 ± 1109   | 0.824            | 0.118        | 0.693        |
| <b>RANKL</b>             | 337 ± 444    | 83.5 ± 356   | 835 ± 500    | <b>&lt;0.001</b> | 0.263        | 0.136        |

**Supplemental Table 6: Correlations between changes in Z-scores and changes in BMI.** Table shows Pearson correlation coefficients and p-values.

|                   | TDF             | TAF             | ABC             |
|-------------------|-----------------|-----------------|-----------------|
| <b>Z-score LS</b> | -0.05 (p=0.868) | -0.05 (p=0.852) | -0.19 (p=0.221) |
| <b>Z-score FN</b> | 0.33 (p=0.249)  | 0.04 (p=0.865)  | -0.09 (p=0.569) |

**Supplemental Table 7: Comparisons of changes in Z-score between treatments adjusting by BMI.** ANCOVA model. Table shows p-values.

|                   | TDF vs. TAF | TDF vs. ABC | TAF vs. ABC |
|-------------------|-------------|-------------|-------------|
| <b>Z-score LS</b> | 0.513       | 0.501       | 0.660       |
| <b>Z-score FN</b> | 0.131       | 0.206       | 0.629       |

Supplemental Table 8: Association between Z-score and variables 48 weeks post-treatment in total cohort.

| Variable          | Z-score LS   |              | Z-score FN  |              |
|-------------------|--------------|--------------|-------------|--------------|
|                   | Coef         | p Value      | Coef        | p Value      |
| Ca                | -0.04        | 0.730        | -0.02       | 0.853        |
| P                 | -0.14        | 0.258        | 0.02        | 0.903        |
| 25 OH Vit. D      | 0.08         | 0.533        | -0.12       | 0.329        |
| CD4               | -0.13        | 0.265        | <b>0.23</b> | <b>0.055</b> |
| CD8               | 0.08         | 0.525        | 0.14        | 0.245        |
| CD4/CD8 ratio     | <b>-0.36</b> | <b>0.002</b> | 0.02        | 0.861        |
| Total Cholesterol | -0.28        | 0.018        | -0.21       | 0.074        |
| Triglycerides     | -0.02        | 0.868        | -0.06       | 0.626        |
| CTX               | -0.05        | 0.711        | 0.12        | 0.385        |
| P1NP              | -0.16        | 0.240        | -0.14       | 0.275        |
| OC                | -0.19        | 0.116        | -0.05       | 0.667        |
| TRAP              | 0.07         | 0.560        | -0.01       | 0.932        |
| PTH               | -0.15        | 0.371        | 0.06        | 0.727        |
| DKK1              | 0.04         | 0.723        | -0.14       | 0.258        |
| OPG               | 0.02         | 0.870        | -0.11       | 0.360        |
| OPN               | 0.07         | 0.589        | -0.02       | 0.872        |
| SOST              | -0.13        | 0.310        | -0.01       | 0.948        |
| FGF23             | 0.06         | 0.625        | -0.17       | 0.183        |
| RANKL             | 0.21         | 0.209        | 0.10        | 0.526        |

Supplemental Table 9: Absolute changes analysis in Z-score with treatment x time interaction. ANOVA provides three p-values, for time effect, treatment effect and interaction between time and treatment

| Variable   | TDF            | TAF            | ABC            | Time  | Treatment | Interaction |
|------------|----------------|----------------|----------------|-------|-----------|-------------|
| Z-score LS | -0.117 ± 0.35  | -0.059 ± 0.654 | -0.140 ± 0.427 | 0.816 | 0.245     | 0.905       |
| Z-score FN | -0.136 ± 0.302 | -0.095 ± 0.275 | -0.214 ± 0.343 | 0.370 | 0.296     | 0.838       |
